# Supplementary material for: Konflikt und Prävention: Paradoxien der Moderne und ihre Wirkungen im Recht
Source: Royal Society of Chemistry journal article supplement (doi:10.1039/c7nr03622a), 2010-01-01
Supplement: c7nr03622a1.pdf [file c7nr03622a1.pdf]

**Supporting Information**

**Fabrication and improved photoelectrochemical properties  
of transferred GaN-based thin film with InGaN/GaN layers**

Dezhong Cao<sup>1,2</sup>, Hongdi Xiao<sup>1,\*</sup>, Qingxue Gao<sup>1</sup>, Xiaokun Yang<sup>1</sup>, Caina Luan<sup>1</sup>, Hongzhi Mao<sup>1</sup>, Jianqiang Liu<sup>2</sup>, Xiangdong Liu<sup>2,3</sup>

<sup>1</sup> *School of Microelectronics, Shandong University, Jinan, 250100, China*

<sup>2</sup> *School of physics, Shandong University, Jinan, 250100, China*

<sup>3</sup> *State Key Laboratory of Crystal Materials, Jinan, 250100, China*

**This file includes:**

**Supplementary Figures S1-S3.**

**Fig. S1** The only etched InGaN/GaN layer of GaN-based film for (a) cross-sectional SEM image and (b) photoconversion efficiency.

**Fig. S2** Photoconversion efficiency as a function of applied potential of the plane n-Si.

**Fig. S3** The XPS overview spectrum of the etched sample before and after PEC water splitting at 0.15 V for 4h.

---

\* Corresponding author. *E-mail address:* [hdxiao@sdu.edu.cn](mailto:hdxiao@sdu.edu.cn) (H. Xiao).

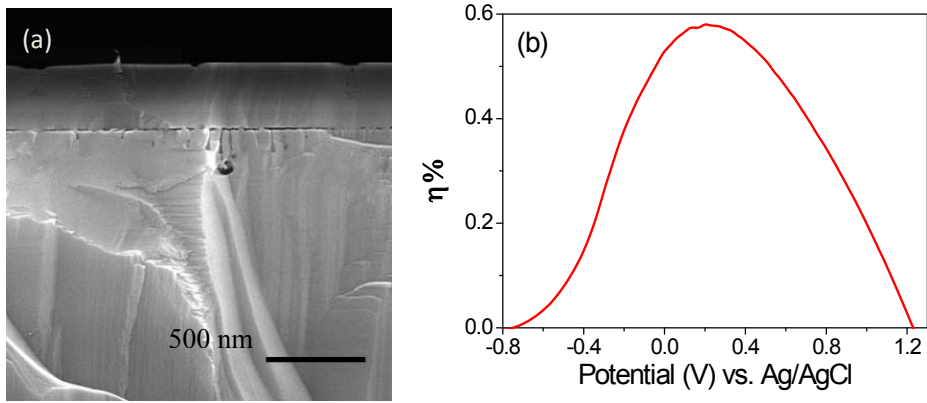

**Fig. S1** The only etched InGaN/GaN layer of GaN-based film for (a) cross-sectional SEM image and (b) photoconversion efficiency.

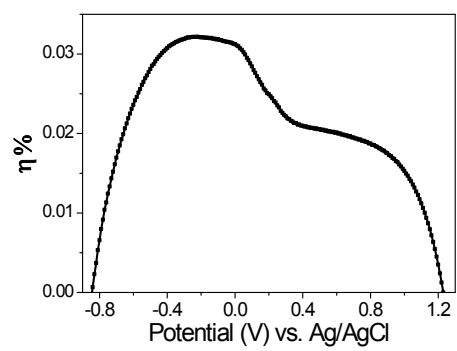

**Fig. S2** Photoconversion efficiency as a function of applied potential of the plane n-Si.

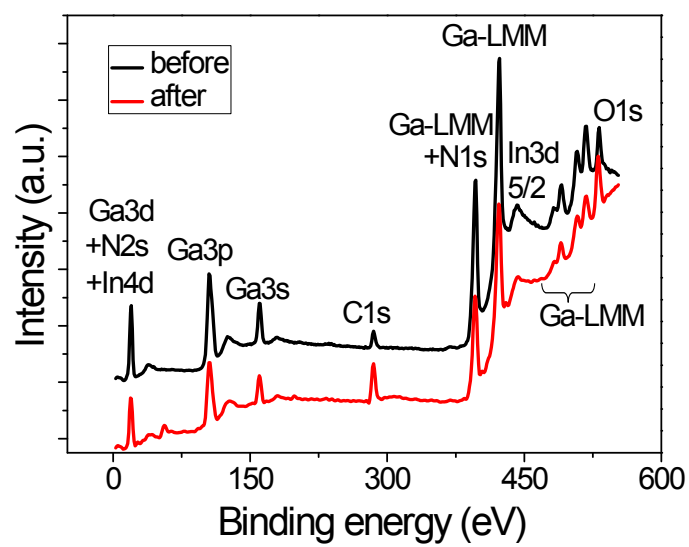

**Fig. S3** The XPS overview spectrum of the etched sample before and after PEC water splitting at 0.15 V for 4h.
